# Supplementary material for: Liraglutide Attenuates Aortic Valve Calcification in a High-Cholesterol-Diet-Induced Experimental Calcific Aortic Valve Disease Model in Apolipoprotein E-Deficient Mice
Source: MDPI journal article supplement (doi:10.3390/jcdd10090386), 2023-09-06
Supplement: s1 [file s1]

## Supplementary Information

### **Liraglutide Attenuates Aortic Valve Calcification in A High Cholesterol Diet-induced Experimental Calcific Aortic Valve Disease Model in Apolipoprotein E-Deficient Mice**

Yangzhao Zhou<sup>1</sup>, Zhaoshun Yuan<sup>1</sup>, Min Wang<sup>1</sup>, Zhiyuan Zhang<sup>1</sup>, Changming Tan<sup>1</sup>, Jiaolian Yu<sup>1</sup>, Yanfeng Bi<sup>1</sup>, Xiaobo Liao<sup>1</sup>, Xinmin Zhou<sup>1</sup>, Md Sayed Ali Sheikh<sup>2</sup>, Dafeng Yang<sup>1</sup>

<sup>1</sup>Department of Cardiovascular Surgery, The Second Xiangya Hospital of Central South University, Changsha, Hunan 410011, China

<sup>2</sup>Department of Internal Medicine, Cardiology, College of Medicine, Jouf University, Sakaka, Saudi Arabia

**Corresponding author:** Dafeng Yang, MD, PhD, Department of Cardiovascular Surgery, The Second Xiangya Hospital, Central South University, 139 Middle Renming Road, Changsha, Hunan 410011, China. Email: dafengyang@csu.edu.cn.

**Supplementary Figure S1. GLP-1R expresses on aortic valvular endothelial and interstitial cells.**

**Supplementary Figure S2. Liraglutide treatment inhibits body weight gain and improves glucose tolerance, but not alter random blood glucose and plasma insulin levels.**

**Supplementary Figure S3. Liraglutide treatment inhibits atherosclerotic lesion formation and improves lipid metabolism.**

**Supplementary Table S1. Primer list.**

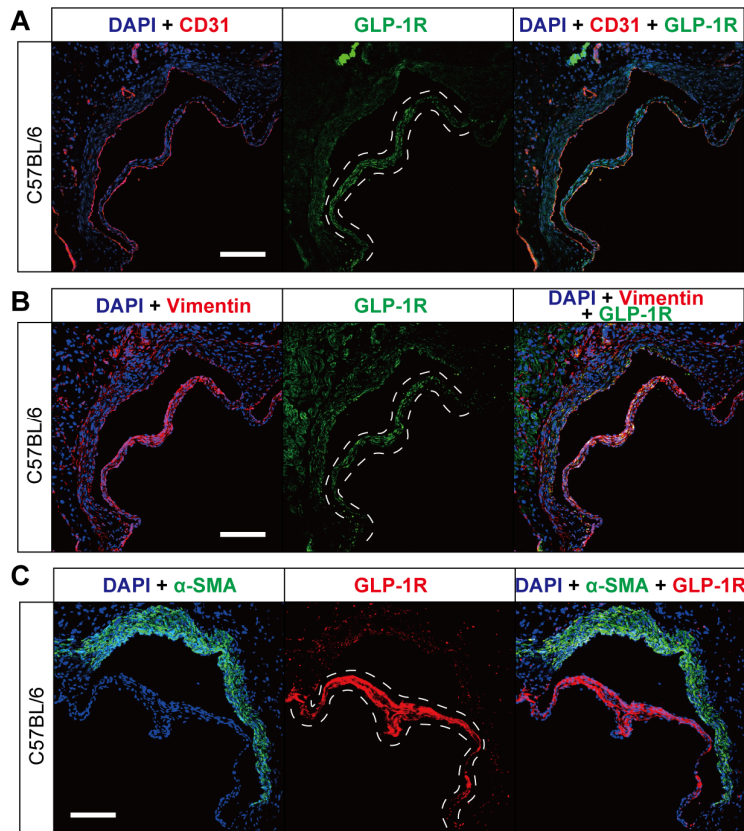

**Supplementary Figure S1. GLP-1R expresses on aortic valvular endothelial and interstitial cells.** Frozen sections of aortic sinus were stained for anti- $\alpha$ -SMA or GLP-1R (green), anti-vimentin, anti-CD31 or anti-GLP-1R (red), and DAPI (blue). **A)** Representative images show GLP-1R expresses on CD31-positive aortic valvular endothelial cells. The dashed line area indicates aortic valves. Scale: 50  $\mu$ m. **B)** Representative images show GLP-1R expresses on vimentin-positive aortic valvular interstitial cells. The dashed line area indicates aortic valves. Scale: 50  $\mu$ m. **C)** Representative images show GLP-1R expresses on  $\alpha$ -smooth muscle actin ( $\alpha$ -SMA)-positive vascular smooth muscle cells. The dashed line area indicates aortic valves. Scale: 50  $\mu$ m.

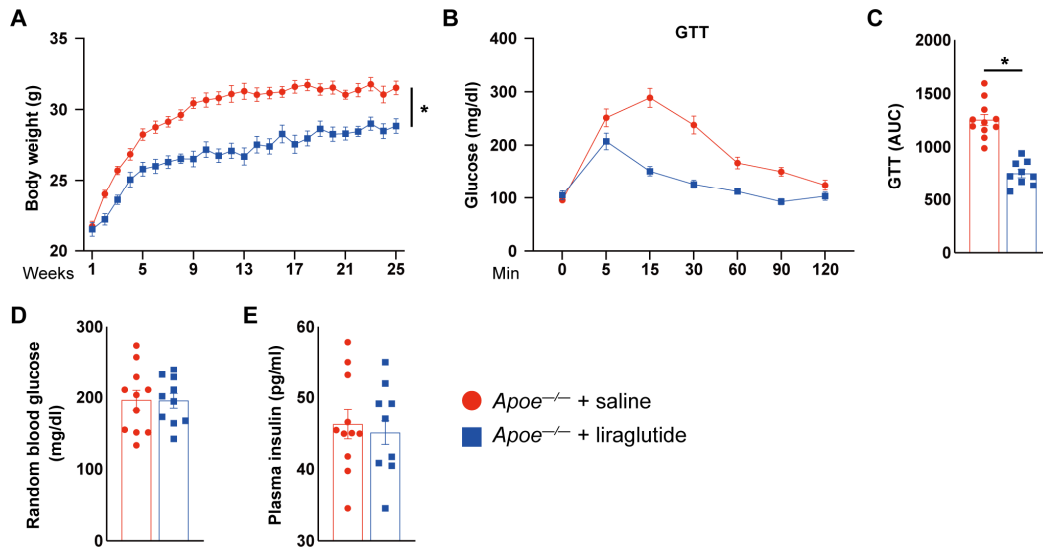

**Supplementary Figure S2. Liraglutide treatment inhibits body weight gain and improves glucose tolerance, but not alter random blood glucose and plasma insulin levels. A)** Body weights over time of *Apoe*<sup>-/-</sup> mice on HCD diet treated with saline or liraglutide. **B)** Blood glucose levels were measured on week 23 for glucose tolerance test (GTT) in *Apoe*<sup>-/-</sup> mice on HCD diet treated with saline or liraglutide. **C)** Area under the curve (AUC) of glucose tolerance test was quantified. **D)** Random blood glucose levels were measured on week 24. **E)** ELISA analysis of plasma insulin of *Apoe*<sup>-/-</sup> mice on HCD diet treated with saline or liraglutide. Data shown are mean  $\pm$  SEM. \* $P < 0.05$ .



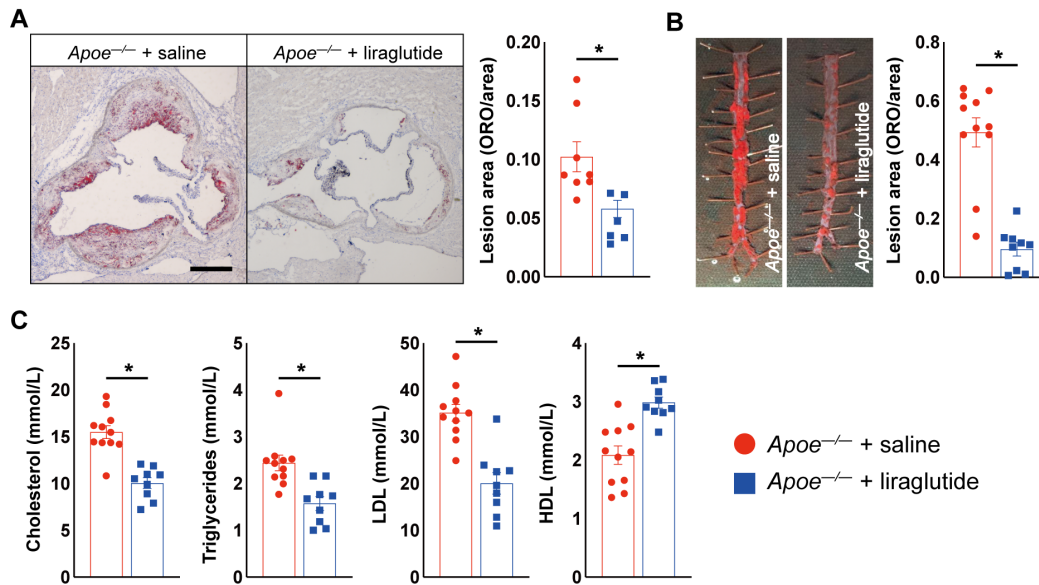

**Supplementary Figure S3. Liraglutide treatment inhibits atherosclerotic lesion formation and improves lipid metabolism. A)** Lesion areas were quantified by Oil Red O (ORO)-stained aortic sinus sections of *Apoe*<sup>-/-</sup> mice on HCD diet treated with saline or liraglutide. Scale: 200  $\mu$ m. **B)** Lesion areas were quantified by Oil Red O (ORO)-stained thoracoabdominal aorta of *Apoe*<sup>-/-</sup> mice on HCD diet treated with saline or liraglutide. **C)** Circulating lipid levels (total cholesterol, triglycerides, LDL-C and HDL-C) in *Apoe*<sup>-/-</sup> mice on HCD diet treated with saline or liraglutide. Data shown are mean  $\pm$  SEM. \* $P < 0.05$ .

**Supplementary Table S1. Primer list.**

| Gene name             | Forward                 | Reverse                |
|-----------------------|-------------------------|------------------------|
| Mouse-GLP-1R          | CCTGTGTCCTTCACCTTCCCTA  | GTACCACGGTGTCCCTCTCA   |
| Mouse-TNF- $\alpha$   | CCCTCACACTCAGATCATCTTCT | GCTACGACGTGGGCTACAG    |
| Mouse-IL-1 $\beta$    | GCAACTGTTCTGAACTCAACT   | ATCTTTTGGGGTCCGTCAACT  |
| Mouse-IL-6            | TAGTCCTTCCTACCCCAATTTCC | TTGGTCCTTAGCCACTCCTTC  |
| Mouse- $\beta$ -actin | GGCTGTATTCCCCTCCATCG    | CCAGTTGGTAACAATGCCATGT |
